# Supplementary material for: Elimination of Pharmaceutical Compounds from Aqueous Solution through Novel Functionalized Pitch-Based Porous Adsorbents: Kinetic, Isotherm, Thermodynamic Studies and Mechanism Analysis
Source: MDPI journal article supplement (doi:10.3390/molecules29020463), 2024-01-17
Supplement: s1 [file s1]

## **Supplementary Information for**

### **Elimination of pharmaceutical compounds from aqueous solution by novel functionalized pitch-based porous adsorbents: Kinetic, isotherm, thermodynamic studies and mechanism analysis**

Qilin Yang<sup>1</sup>, Hongwei Zhao <sup>1,2,\*</sup>, Qi Peng<sup>1</sup>, Guang Chen<sup>1</sup>, Jiali Liu<sup>1</sup>, Xinxiu Cao<sup>1,2</sup>,

Shaohui Xiong<sup>1,2</sup>, Gen Li<sup>1,2</sup>, Qingquan Liu <sup>1,2,\*</sup>

<sup>1</sup> *School of Material Science and Engineering, Hunan University of Science and Technology, Xiangtan 411201, China*

<sup>2</sup> *Hunan Provincial Key Laboratory of Advanced Materials for New Energy Storage and Conversion, Hunan University of Science and Technology, Xiangtan 411201, China*

*\* Corresponding Author: Hongwei Zhao, E-mail: hwzhao@hnust.edu.cn; Qingquan Liu, E-mail: qqliu@hnust.edu.cn.*

## Table of Contents

|                  |                                                                                                                                                               |
|------------------|---------------------------------------------------------------------------------------------------------------------------------------------------------------|
| <b>Figure S1</b> | Standard curves of DFS(a,d), AMP(b,e), and Antipyrine(c,f).                                                                                                   |
| <b>Figure S2</b> | Isotherm adsorption capacity for pitch-based HCP adsorbents toward PPCPs (a) DFS, (b) AMP, and (c) Antipyrine with different initial concentrations at 35 °C. |
| <b>Figure S3</b> | Isotherm adsorption capacity for pitch-based HCP adsorbents toward PPCPs (a) DFS, (b) AMP, and (c) Antipyrine with different initial concentrations at 45 °C. |
| <b>Figure S4</b> | Langmuir (a-c), Freundlich (d-f), and D-R (g-i) isotherms for the adsorption of pitch-based HCP adsorbents toward DFS, AMP, and antipyrine at 35 °C.          |
| <b>Figure S5</b> | Langmuir (a-c), Freundlich (d-f), and D-R (g-i) isotherms for the adsorption of pitch-based HCP adsorbents toward DFS, AMP, and antipyrine at 45 °C.          |
| <b>Table S1</b>  | Correlation coefficient and isotherm parameters for the adsorption of pitch-based HCP adsorbents at 35 °C.                                                    |
| <b>Table S2</b>  | Correlation coefficient and isotherm parameters for the adsorption of pitch-based HCP adsorbents at 45 °C.                                                    |
| <b>Table S3</b>  | DFS adsorption performance of P-MPHCP compared to other reported adsorbents.                                                                                  |
| <b>Figure S6</b> | Chemical and structural characteristics of three PPCPs.                                                                                                       |

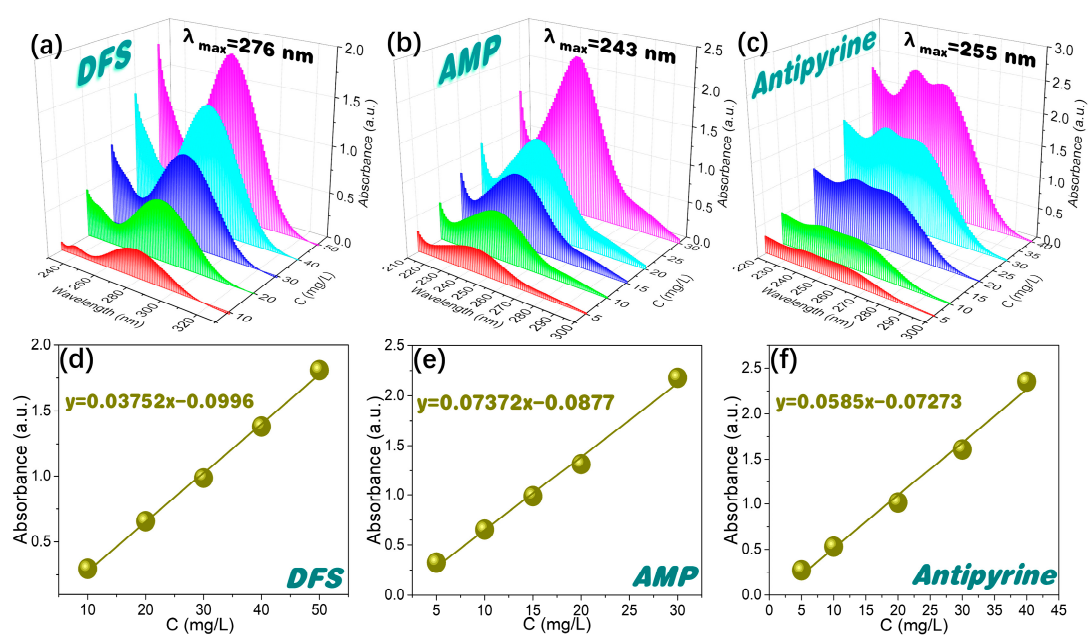

Fig. S1. Standard curves of DFS(a,d), AMP(b,e), and Antipyrine(c,f).

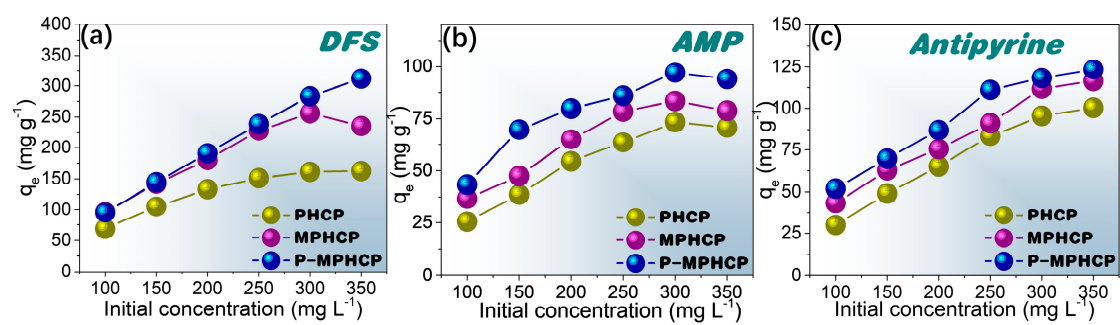

Fig. S2. Isotherm adsorption capacity for pitch-based HCP adsorbents toward PPCPs (a) DFS, (b) AMP, and (c) Antipyrine with different initial concentrations at 35 °C.

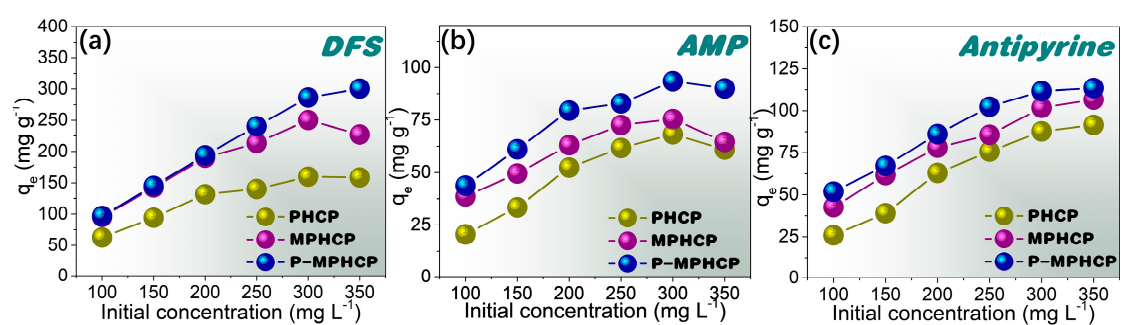

Fig. S3. Isotherm adsorption capacity for pitch-based HCP adsorbents toward PPCPs (a) DFS, (b) AMP, and (c) Antipyrine with different initial concentrations at 45 °C.

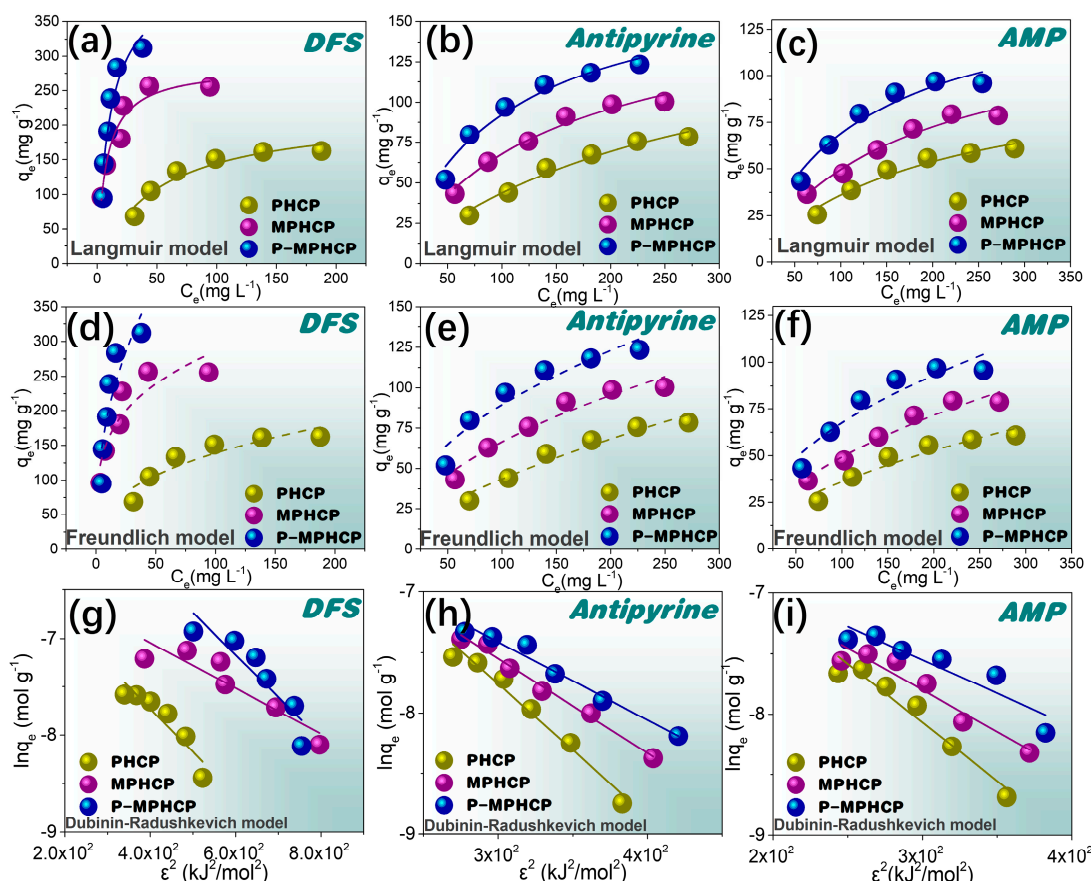

Fig. S4. Langmuir (a-c), Freundlich (d-f), and D-R (g-i) isotherms for the adsorption of pitch-based HCP adsorbents toward DFS, AMP, and antipyrine at 35 °C.

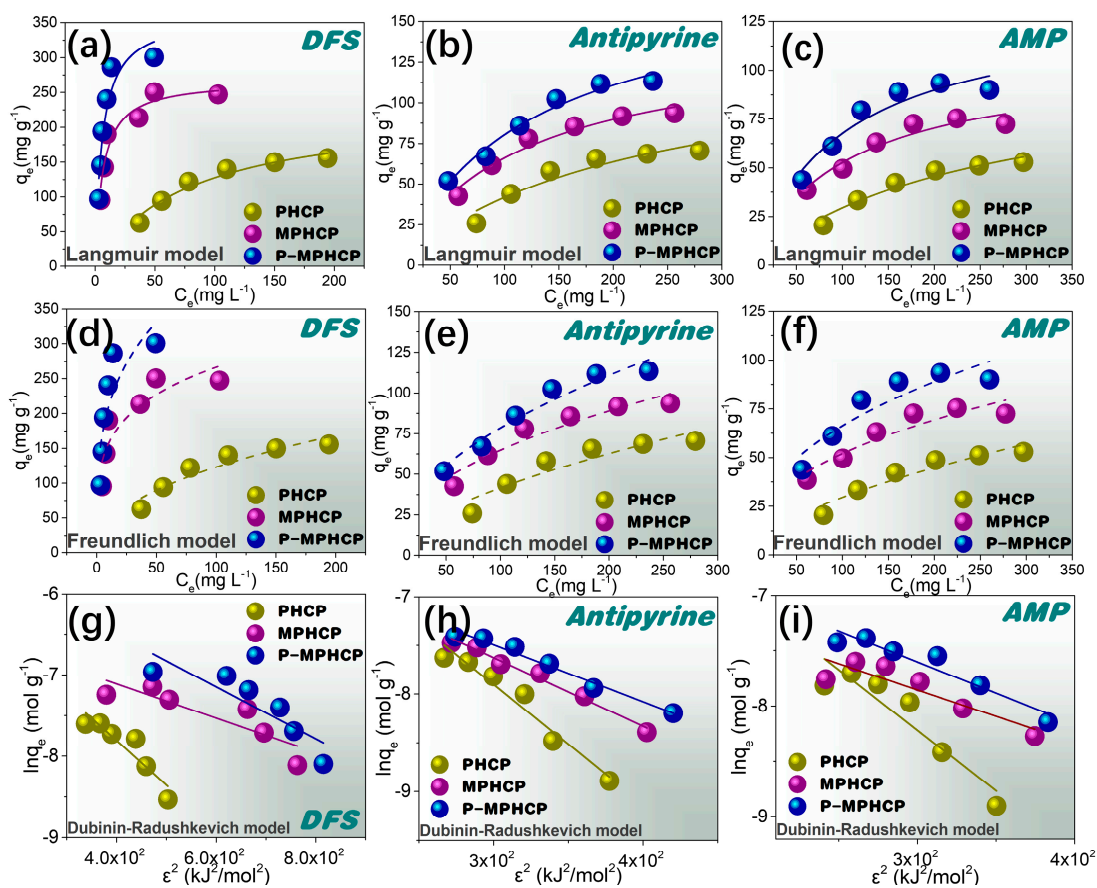

Fig. S5. Langmuir (a-c), Freundlich (d-f), and D-R (g-i) isotherms for the adsorption of pitch-based HCP adsorbents toward DFS, AMP, and antipyrine at 45 °C.

Table S1. Correlation coefficient and isotherm parameters for the adsorption of pitch-based HCP adsorbents at 35 °C.

| Sample  | PPCP       | Langmuir isotherm |         |        | Freundlich isotherm |       |        | Dubinin-Redushkevich isotherm |        |       |        |
|---------|------------|-------------------|---------|--------|---------------------|-------|--------|-------------------------------|--------|-------|--------|
|         |            | $q_{\max}$        | $K_L$   | $R^2$  | $n$                 | $K_F$ | $R^2$  | $q_{DR}$                      | $B$    | $E_a$ | $R^2$  |
| PHCP    | DFS        | 217.3             | 0.0198  | 0.9339 | 2.658               | 24.55 | 0.8512 | 0.0027                        | 0.0045 | 10.55 | 0.8697 |
|         | AMP        | 105.4             | 0.0052  | 0.9595 | 1.828               | 2.908 | 0.9223 | 0.0057                        | 0.0097 | 7.19  | 0.9495 |
|         | Antipyrine | 163.9             | 0.0037  | 0.9757 | 1.555               | 2.260 | 0.9538 | 0.0115                        | 0.0110 | 6.75  | 0.9751 |
| MPHCP   | DFS        | 283.8             | 0.1329  | 0.9418 | 3.888               | 87.38 | 0.8454 | 0.0022                        | 0.0024 | 14.56 | 0.8475 |
|         | AMP        | 134.8             | 0.00581 | 0.9713 | 1.863               | 4.159 | 0.9513 | 0.0033                        | 0.0069 | 8.49  | 0.9172 |
|         | Antipyrine | 165.1             | 0.0069  | 0.9768 | 1.919               | 6.025 | 0.9455 | 0.0055                        | 0.0079 | 7.98  | 0.9876 |
| P-MPHCP | DFS        | 424.0             | 0.1062  | 0.9142 | 2.909               | 82.57 | 0.8080 | 0.0106                        | 0.0044 | 10.70 | 0.8317 |
|         | AMP        | 155.1             | 0.0064  | 0.9734 | 1.878               | 5.126 | 0.9414 | 0.0027                        | 0.0055 | 9.53  | 0.8630 |
|         | Antipyrine | 210.3             | 0.0059  | 0.9860 | 1.738               | 5.404 | 0.9632 | 0.0042                        | 0.0065 | 8.79  | 0.9726 |

Table S2. Correlation coefficient and isotherm parameters for the adsorption of pitch-based HCP adsorbents at 45 °C.

| Sample  | PPCP       | Langmuir isotherm |        |        | Freundlich isotherm |       |        | Dubinin-Redushkevich isotherm |         |       |        |
|---------|------------|-------------------|--------|--------|---------------------|-------|--------|-------------------------------|---------|-------|--------|
|         |            | $q_{\max}$        | $K_L$  | $R^2$  | $n$                 | $K_F$ | $R^2$  | $q_{DR}$                      | $B$     | $E_a$ | $R^2$  |
| PHCP    | DFS        | 227.7             | 0.0127 | 0.9573 | 2.2011              | 15.18 | 0.9004 | 0.0036                        | 0.00548 | 9.55  | 0.8536 |
|         | AMP        | 100.9             | 0.0041 | 0.9476 | 1.6811              | 1.915 | 0.9126 | 0.0071                        | 0.0109  | 6.77  | 0.8714 |
|         | Antipyrine | 133.7             | 0.0046 | 0.9125 | 1.6978              | 2.766 | 0.8699 | 0.0143                        | 0.0122  | 6.40  | 0.9539 |
| MPHCP   | DFS        | 267.7             | 0.1597 | 0.9217 | 4.3657              | 92.74 | 0.8149 | 0.0019                        | 0.0021  | 15.43 | 0.7543 |
|         | AMP        | 106.2             | 0.0098 | 0.9317 | 2.4176              | 7.748 | 0.8778 | 0.0016                        | 0.00475 | 10.26 | 0.8090 |
|         | Antipyrine | 139.8             | 0.0090 | 0.9652 | 2.1889              | 7.904 | 0.9168 | 0.0040                        | 0.007   | 8.45  | 0.9826 |
| P-MPHCP | DFS        | 361.1             | 0.1711 | 0.9469 | 4.0110              | 95.21 | 0.8232 | 0.0053                        | 0.00319 | 12.52 | 0.7770 |
|         | AMP        | 133.8             | 0.0102 | 0.9198 | 2.3731              | 8.149 | 0.8708 | 0.0027                        | 0.00561 | 9.44  | 0.9182 |
|         | Antipyrine | 196.0             | 0.0058 | 0.9767 | 1.7488              | 5.073 | 0.9486 | 0.0032                        | 0.00582 | 9.27  | 0.9748 |

Table S3. DFS adsorption performance of P-MPHCP compared to other reported adsorbents.

| Adsorbent                                   | pH  | $q_{\max}$ (mg/g)<br>(Langmuir model) | Stabilization<br>time (h) | Reference |
|---------------------------------------------|-----|---------------------------------------|---------------------------|-----------|
| P-MPHCP                                     | 5   | 444                                   | 1                         | This work |
| Expanded Graphite                           | -   | 330                                   | -                         | [1]       |
| OAC(2.0)                                    | 4.2 | 487                                   | 3                         | [2]       |
| Commercial AC                               | 4.2 | 76                                    | 5                         | [2]       |
| PCDM-1000                                   | -   | 400                                   | 12                        | [3]       |
| ZIF-8                                       | -   | 100                                   | 12                        | [3]       |
| OH-MCOF                                     | 5   | 203                                   | 0.5                       | [4]       |
| CTAB-ZIF-67                                 | 8   | 43.9                                  | 1                         | [5]       |
| P-POP-1                                     | 4   | 166                                   | 2                         | [6]       |
| P-POP-2                                     | 4   | 217                                   | 1                         | [6]       |
| PONF                                        | 4   | 380.8                                 | 0.5                       | [7]       |
| ZCPC-10                                     | 7.4 | 70                                    | -                         | [8]       |
| ZCPC-20                                     | 7.4 | 134                                   | -                         | [8]       |
| ZCPC-30                                     | 7.4 | 159                                   | -                         | [8]       |
| CNT/Al <sub>2</sub> O <sub>3</sub>          | 4   | 27                                    | -                         | [9]       |
| Fe <sub>3</sub> O <sub>4</sub> @MOF-100(Fe) | 5   | 377                                   | 2                         | [10]      |

**( a ) Diclofenac ( DFS )**

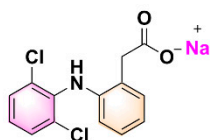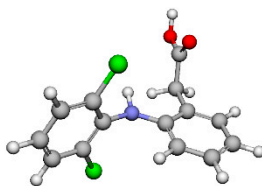

Molecular weight: 318.13;

$\lambda_{\max}(\text{nm})=276 \text{ nm}$ ;

$\text{pK}_{\text{a}}=4.15$  <sup>[7]</sup>;

**( b ) Antipyrine**

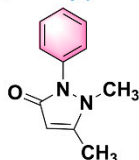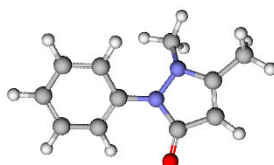

Molecular weight: 188.22;

$\lambda_{\max}(\text{nm})=255 \text{ nm}$ ;

$\text{pK}_{\text{a}}=1.4$  <sup>[11]</sup>;

**( c ) 4-acetylaminophenol ( AMP )**

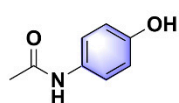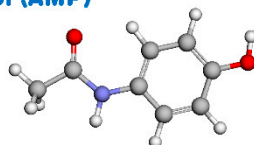

Molecular weight: 151.26;

$\lambda_{\max}(\text{nm})=243 \text{ nm}$ ;

$\text{pK}_{\text{a}}=9.38$  <sup>[12]</sup>;

Fig. S6. Chemical and structural characteristics of three PPCPs [7, 11, 12].

## References

- [1] Vedenyapina M.D., Borisova D.A., Simakova A.P., et al. Adsorption of diclofenac sodium from aqueous solutions on expanded graphite[J]. Solid Fuel Chemistry, 2013, 47(1): 59-63.
- [2] Bhadra B.N., Seo P.W., Jhung S.H. Adsorption of diclofenac sodium from water using oxidized activated carbon[J]. Chemical Engineering Journal, 2016, 301: 27-34.
- [3] Bhadra B.N., Ahmed I., Kim S., et al. Adsorptive removal of ibuprofen and diclofenac from water using metal-organic framework-derived porous carbon[J]. Chemical Engineering Journal, 2017, 314: 50-58.
- [4] Mi X., Zhou S., Zhou Z., et al. Adsorptive removal of diclofenac sodium from aqueous solution by magnetic COF: Role of hydroxyl group on COF[J]. Colloids and Surfaces A: Physicochemical and Engineering Aspects, 2020, 603: 125238.
- [5] Andrew Lin K.Y., Yang H., Lee W.D. Enhanced removal of diclofenac from water using a zeolitic imidazole framework functionalized with cetyltrimethylammonium bromide (CTAB)[J]. RSC Advances, 2015, 5(99): 81330-81340.
- [6] Ravi S., Choi Y., Choe J.K. Novel phenyl-phosphate-based porous organic polymers for removal of pharmaceutical contaminants in water[J]. Chemical Engineering Journal, 2020, 379: 122290.
- [7] Ravi S., Choi Y., Wu S., et al. Porous organic nanofiber polymers as superfast adsorbents for capturing pharmaceutical contaminants from water[J]. Environmental Science: Nano, 2022, 9(2): 730-741.
- [8] Krajisnik D., Dakovic A., Milojevic M., et al. Properties of diclofenac sodium sorption onto natural zeolite modified with cetylpyridinium chloride[J]. Colloids and Surfaces B: Biointerfaces, 2011, 83(1): 165-172.
- [9] Wei H., Deng S., Huang Q., et al. Regenerable granular carbon nanotubes/alumina hybrid adsorbents for diclofenac sodium and carbamazepine removal from aqueous solution[J]. water research, 2013, 47(12): 4139-4147.
- [10] Zheng X., Wang J., Xue X., et al. Facile synthesis of Fe<sub>3</sub>O<sub>4</sub>@MOF-100(Fe) magnetic microspheres for the adsorption of diclofenac sodium in aqueous solution[J]. Environmental Science and Pollution Research, 2018, 25(31): 31705-31717.
- [11] Sangster J. Phase Diagrams and Thermodynamic Properties of Binary Organic

Systems Based on 1,2-, 1,3-, 1,4-Diaminobenzene or Benzidine[J].Journal of Physical & Chemical Reference Data, 1994, 23(2):295-338.

- [12] Mark F. H. and Jennifer L. L. Determination of  $\log K_{ow}$  Values for Four Drugs. Journal of Chemical Education 2014 91(6),915-918.
